# Supplementary material for: A novel role for lipoxin A4 in driving a lymph node–eye axis that controls autoimmunity to the neuroretina
Source: eLife journal article supplement (doi:10.7554/elife.51102), 2020-03-02
Supplement: supp [file elife-51102-supp-v1.zip]

Archive with 5 entries (5 files):
- elife_poa_e51102_Figure_2_figure_supplement_1.pdf
- elife_poa_e51102_Figure_1_figure_supplement_1.pdf
- elife_poa_e51102_Supplementary_file_1.docx
- elife_poa_e51102_Transparent_Reporting_File.pdf
- elife_poa_e51102_Figure_5_figure_supplement_1.pdf
