# Supplementary figures and images for: A novel role for lipoxin A4 in driving a lymph node–eye axis that controls autoimmunity to the neuroretina
Source: eLife journal article supplement (doi:10.7554/elife.51102), 2020-03-02

Figure 2-figure supplement 1

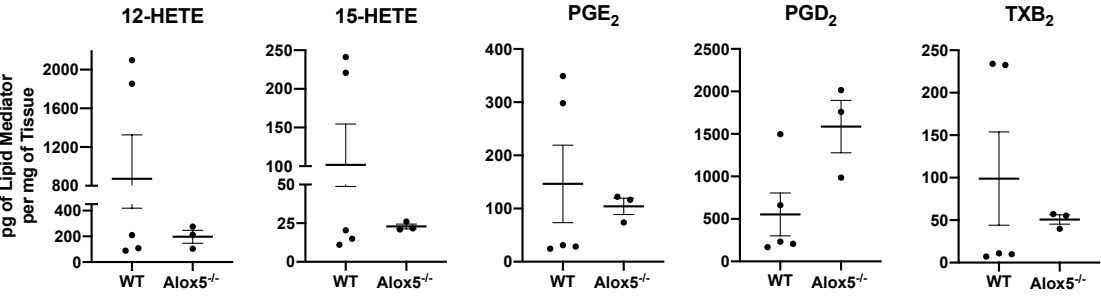

Supplement: supp [file elife-51102-supp-v1.zip › elife_poa_e51102_Figure_2_figure_supplement_1.pdf]

Figure 1-figure supplement 1

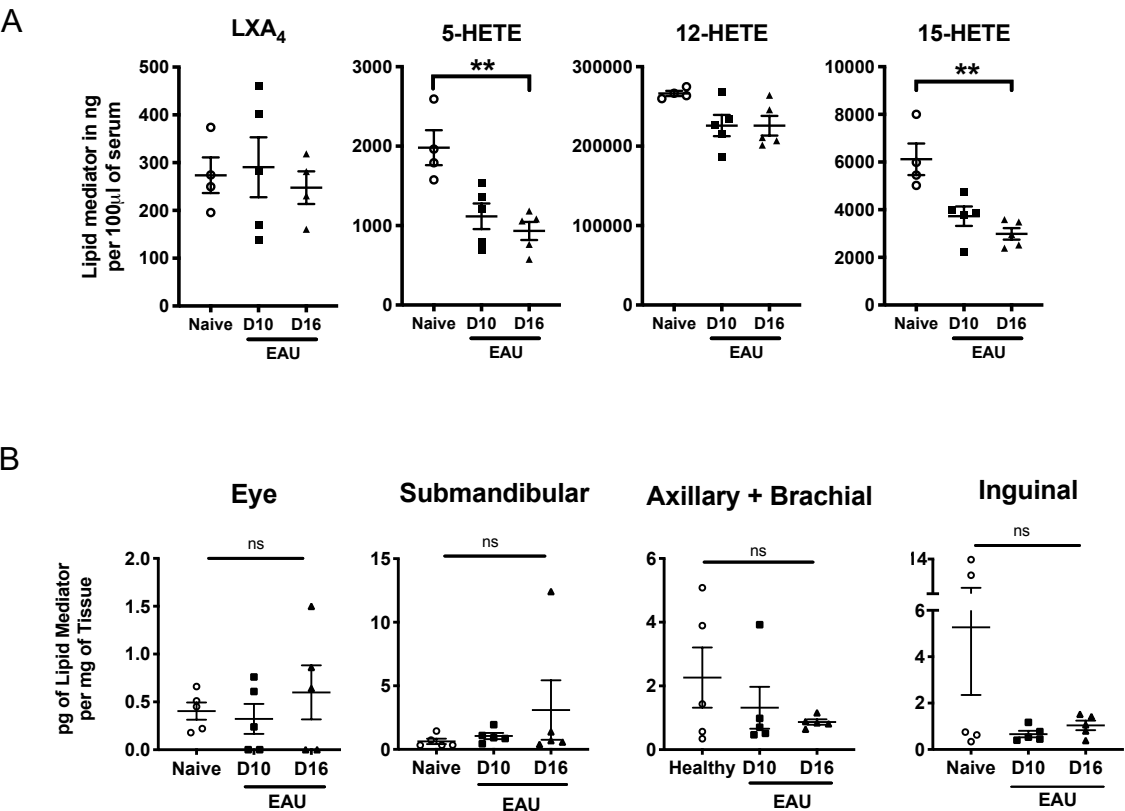

Supplement: supp [file elife-51102-supp-v1.zip › elife_poa_e51102_Figure_1_figure_supplement_1.pdf]

Figure 5-figure supplement 1

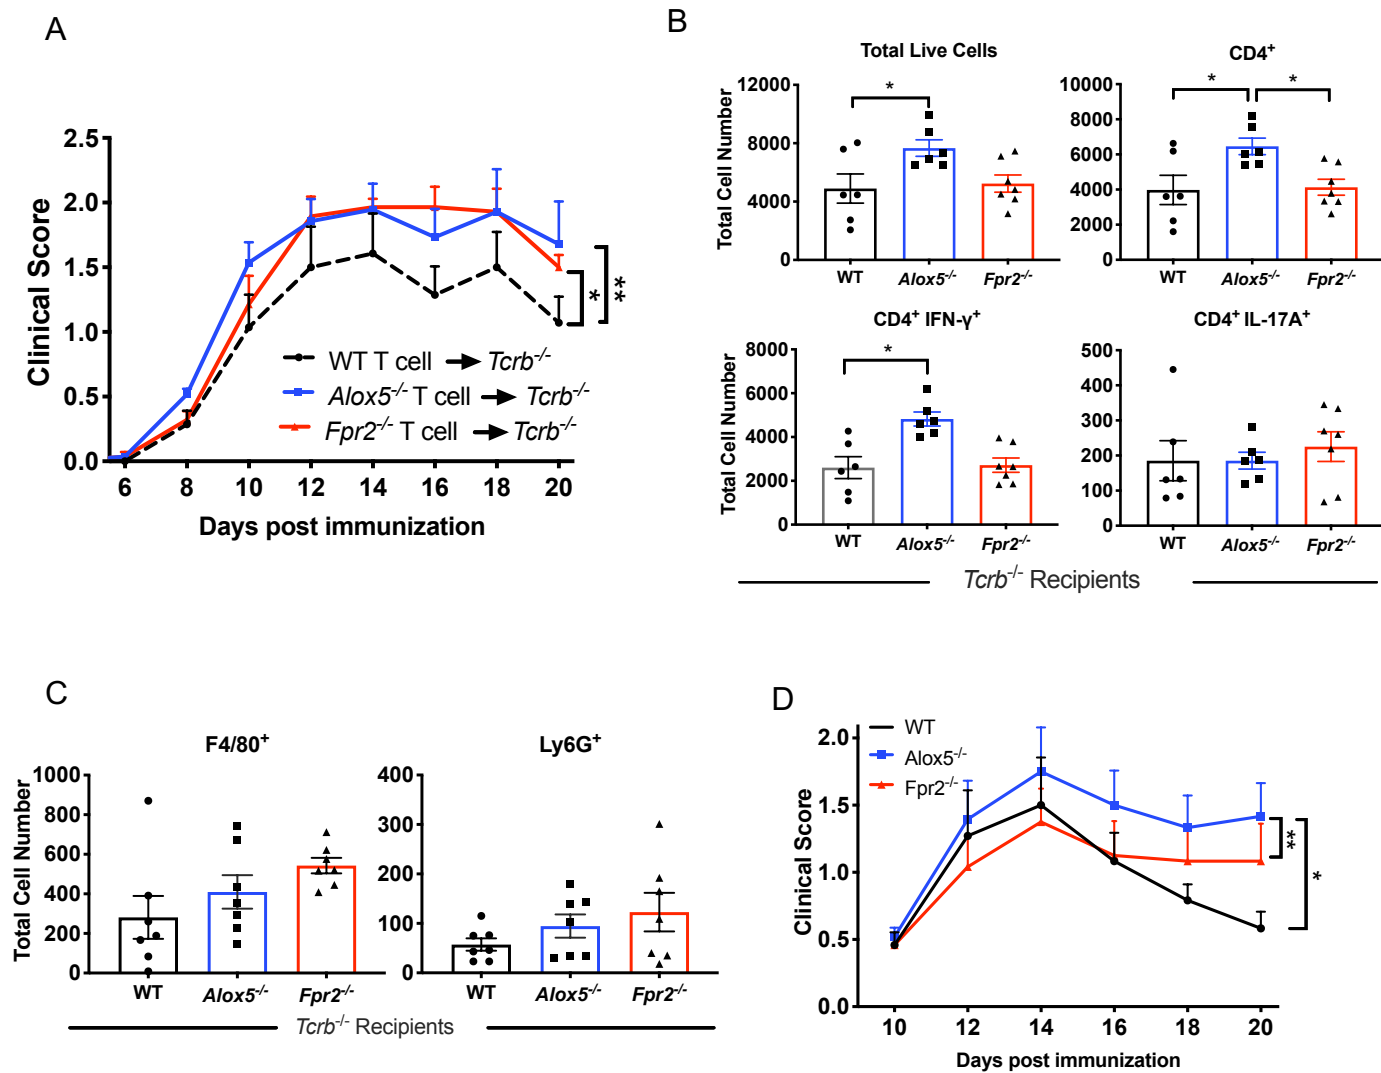

Supplement: supp [file elife-51102-supp-v1.zip › elife_poa_e51102_Figure_5_figure_supplement_1.pdf]
